# Supplementary material
Source: PubMed Central journal article supplement (PMC3245695)
Supplement: embor2011205s2.pdf [file embor2011205s2.pdf]

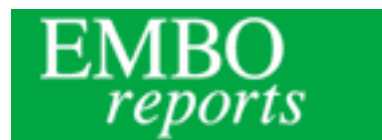

Manuscript EMBOR-2010-34923

## **Mechanistic implications for receptor degradation from the PCSK9/LDLR complex structure at neutral pH**

Paola Lo Surdo, Matthew J. Bottomley, Alessandra Calzetta, Ethan C. Settembre, Agostino Cirillo, Shilpa Pandit, Yan G. Ni, Brian Hubbard, Ayesha Sitlani and Andrea Carfi

*Corresponding author: Andrea Carfi, Novartis Vaccines & Diagnostics*

---

### **Review timeline:**

Submission date:

24 March 2011

Accepted:

12 September 2011

---

### **Transaction Report:**

No Peer Review Process File is available with this article, as the authors have chosen not to make the review process public in this case.
